# Supplementary material for: Intermittent glucocorticoid treatment enhances skeletal muscle performance through sexually dimorphic mechanisms
Source: PubMed Central journal article supplement (PMC8920338; doi:10.1172/jci149828), 2022-03-15
Supplement: jci-132-149828-s177.pdf [file jci-132-149828-s177.pdf]

## SUPPLEMENTAL INFORMATION

**Supplemental Table 1. Antibodies used for immunoblot**

| <b>Antibody</b>      | <b>Dilution</b> | <b>Catalog #</b> | <b>Source</b>                       |
|----------------------|-----------------|------------------|-------------------------------------|
| 4EBP1                | 1:1,000         | A300-501A        | Bethyl                              |
| phospho-4EBP1        | 1:1,000         | 2855             | Cell Signaling Technology           |
| S6K                  | 1:1,000         | A300-510A        | Bethyl                              |
| CASQ1/2              | 1:1,000         | ab3516           | Abcam                               |
| SERCA2               | 1:10,000        | MA3-919          | Thermo Fisher                       |
| Goat anti-mouse HRP  | 1:2,500         | 115-035-003      | Jackson ImmunoResearch Laboratories |
| Goat anti-rabbit HRP | 1:2,500         | 111-035-003      | Jackson ImmunoResearch Laboratories |

**Supplemental Table 2. qPCR primers**

| <b>Gene</b>    | <b>Forward Primer (5' to 3')</b> | <b>Reverse Primer (5' to 3')</b> |
|----------------|----------------------------------|----------------------------------|
| <i>Acad11</i>  | TAACGGCAAGAAGTGGTGGGA            | TGTGCTGTCTGTGTCTGGAT             |
| <i>Acs1</i>    | GACTTGTTGAAACTTGGGAA             | CATCTATCTGCGACCTGAAA             |
| <i>Acsm3</i>   | CCCAGCAGTAGATGCCGTG              | TTCGTCGTGTTTTGTGTCCA             |
| <i>Acss2</i>   | GCAACTACAAACATCTGCTACA           | ATCTTGGTGGTCTCCCCTG              |
| <i>Acss3</i>   | AAGTCTTCCGAGTTCCCGTT             | CCTGGTGGAGGTGTTTTGG              |
| <i>Agpat2</i>  | CATCATCCCCGTGGTGTA               | GAAATCTGTAGAAAGGTGGC             |
| <i>Akt1</i>    | GCCTGCCCTTCTACAACCA              | CATACACATCCTGCCACACG             |
| <i>Ar</i>      | ACTATTACTTTCCACCCCA              | CAGAGTCATCCCTGCTTC               |
| <i>Atp2b2</i>  | AATGCCCCGCTGTTTTGCT              | ATCTGCCAGGACCATCTCA              |
| <i>Cacna1h</i> | CCCATCAACCCACCAT                 | AGCATAGATAAAAAACAGGAG            |
| <i>Casq2</i>   | TGCGGAGAAGAGTGACCC               | AGCAACAAGCAGTGGAAAGT             |
| <i>Chpt1</i>   | GCTCATTGGCAGACTTACG              | GTCCCACATTGTTGCTCCT              |
| <i>Cidea</i>   | TTCCTCGGCTGTCTCAA                | CAGATTCTTAACACGGC                |
| <i>Cidec</i>   | ATCGGAAGGTTTCGCAAAGG             | CCAGCACCAGGGAGAAGG               |
| <i>Ehhadh</i>  | CTTGGGCTGTCACTATCG               | TTGGGACTGGCTTGTTTA               |
| <i>Esr1</i>    | AGCATTCAAGGACACAA                | CTTCCAAGTCATCTCTCTG              |
| <i>Fabp4</i>   | GTGGGAGTGGGCTTTGC                | GCTCTTCACCTTCCTGTCTG             |
| <i>Fbxo32</i>  | GGCTACTGTGGAAGAGACT              | CAGGAGAGAATGTGGCA                |
| <i>Hadha</i>   | TGAAGTGTTGCTGGGGAT               | CACGAATGTTCTGCCA                 |
| <i>Igf1</i>    | TCACACCTCTTCTACCTGGC             | GTGCCCTCCGAATGCTG                |
| <i>Irs2</i>    | ATCAGGTATCTGGGGTGGAG             | GACGGTGGTGGTAGAGGAAA             |
| <i>Itga3</i>   | TCATCTGTCTTCCACGGCTT             | CTGGTTGAGGACTGGGTAGG             |
| <i>Itga5</i>   | AAGGGAGAGGAGCCTGTGG              | CGGGTGAAGTTTTCTGTGGA             |
| <i>Jun</i>     | GCCCCTGTCCCCTATCG                | TGAGTTGGCACCCACTGTTA             |
| <i>Junb</i>    | TCACGACGACTCTTACGCAG             | GACCCTTGAGACCCCGATAG             |
| <i>Lipe</i>    | TGAGATTGAGGTGCTGTCGT             | GGTAACTGTGAGCCTGGGAT             |
| <i>Pik3c2a</i> | AGCCCACCATTTCGTTTCC              | GCTTCAGCATCTGTAGTTTG             |
| <i>Pik3ca</i>  | CCTGGGGAAACATAAACTT              | AAACTTCACCACACTGCTG              |
| <i>Slc27a1</i> | GGAGTCGTGGAGGTCTGAAG             | GATGATTGATGGTTGCCGC              |
| <i>Tnnc1</i>   | AGGTGATGAGGATGCTGG               | ACTTCCCTTTGCTGTCGTC              |
| <i>Tnni1</i>   | TGTCTCTCAGTGCCCTTCA              | ATCTCTCTGGTGTGTGGA               |
| <i>Tnnt1</i>   | GCACTAAAAGACCGCATTG              | AGTTTCATCTCCCGACCAG              |
| <i>Trim63</i>  | TAGCCTGATTCTGATG                 | GGTCCAGTAGGGATTG                 |

**Supplemental Table 3. qPCR primers used to identify GR enrichment at putative binding sites**

| Category         | Gene of Interest | Location                      | Forward Primer (5' to 3') | Reverse Primer (5' to 3')    |
|------------------|------------------|-------------------------------|---------------------------|------------------------------|
| negative control | n/a              | chr15:15,752,358-15,752,522   | GCCGAAATGTATGAGTAGCC<br>A | AATGAATGAGCCCTTCCCCA         |
| positive control | <i>Fkbp5</i>     | chr17:28,420,152-28,420,344   | GCCACATTCAGAACAGG         | TACTCCAACAAACCCAC            |
| calcium-handling | <i>Cacna1h</i>   | chr17:25,434,130-25,434,246   | CACGCCTGCTGAGCCCG         | TCCTTCCCCACCCCACTGC          |
| calcium-handling | <i>Tnnc1</i>     | chr14:31,206,433-31,206,508   | GCAGAACCTTCCACGCACT       | CGACCCAGGGGCTTTGA            |
| calcium-handling | <i>Tnnt1</i>     | chr7:4,522,438-4,522,594      | TAGAGTCAAAGGAGGAGGG<br>G  | GACACTGAGATAAGGGGCG<br>A     |
| IGF1 pathway     | <i>Akt1</i>      | chr12:112,666,788-112,666,871 | CCTTTACCCTCTAAGCCATC<br>T | TTACCCATCCTCCCTCTCC          |
| IGF1 pathway     | <i>Ar</i>        | chrX:98,148,575-98,148,652    | CAACCATACTACGCCAGCAC      | TTTCCTTTTCTCCCCTCCC          |
| IGF1 pathway     | <i>Pik3c2a</i>   | chr7:116,444,010-116,444,188  | CCTCTCCTCCGACAGTTAC       | GCCAGACATCACACCCAG           |
| IGF1 pathway     | <i>Pik3ca</i>    | chr3:32,454,532-32,454,665    | GCACGCTGCTGTCTTTGT        | ATAATACCCCAAGTTCCCCA         |
| lipid metabolism | <i>Cidea</i>     | chr18:67,511,497-67,511,622   | TTACTCTTCCCCACTTATGAT     | CTGTCTGTGTCTGCTGATGT         |
| lipid metabolism | <i>Cidec</i>     | chr6:113,385,708-113,385,789  | TGGGTTCTGGAATGTGGT        | TAGGGTGAAGTCTCTGGC           |
| lipid metabolism | <i>Esr1</i>      | chr10:5,674,439-5,674,518     | GGAACACTGGTGAAGGCT        | ATGCTCTCTTTTAGTATTATT<br>TTA |
| lipid metabolism | <i>Slc27a1</i>   | chr8:71,561,278-71,561,409    | ATTACTCTTTGAGGGGACAT      | AAGGGAGTAGTGGGGGAA           |
| lipid metabolism | <i>Slc27a1</i>   | chr8:71,575,870-71,575,940    | CAGGAGGCAGAGACAGGC        | TAGAACTTGCTACATAGACC<br>AGG  |

**Supplemental Table 4. Abundance of compounds of interest from untargeted lipidomics**

| Compound                          | Compound Class           | Vehicle |       |       |       |        | Weekly |       |       |       |       | Fold Change | P-value   |
|-----------------------------------|--------------------------|---------|-------|-------|-------|--------|--------|-------|-------|-------|-------|-------------|-----------|
|                                   |                          |         |       |       |       |        |        |       |       |       |       |             |           |
| CL 78:12                          | cardiolipin              | 2.14    | 2.88  | 2.59  | 0.86  | 3.03   | 5.53   | 2.44  | 3.23  | 4.17  | 5.27  | 1.79        | 0.0324    |
| DG 12:0/18:2                      | diglyceride              | 9.79    | 7.98  | 8.99  | 8.33  | 10.11  | 7.28   | 7.99  | 6.98  | 8.40  | 7.99  | 0.85        | 0.0267    |
| DG 14:0/16:1                      | diglyceride              |         | 16.53 | 16.44 | 15.46 | 16.97  | 15.87  | 0.12  | 12.66 | 1.45  | 0.03  | 0.37        | 0.0323    |
| DG 18:0/18:1                      | diglyceride              | 2.48    | 1.86  | 2.08  | 1.68  | 2.59   | 1.25   | 1.68  | 1.73  |       | 1.78  | 0.75        | 0.0520    |
| DG 18:1/18:1                      | diglyceride              | 3.06    | 1.96  | 3.36  | 2.24  | 3.17   | 2.08   | 1.62  | 1.84  |       | 1.89  | 0.67        | 0.0270    |
| DG 18:1/22:6                      | diglyceride              | 2.43    | 1.70  | 2.08  | 1.15  | 2.27   | 1.16   | 1.35  | 1.29  |       | 1.45  | 0.68        | 0.0540    |
| LPC 19:1                          | lyso-phosphatidylcholine | 3.23    | 0.24  | -0.51 | -0.24 | 2.37   | -0.43  | -0.83 | -18.6 | -5.44 | -22.1 | -9.33       | 0.0528    |
| PC 13:0/20:4                      | phosphatidylcholine      | 0.72    | 0.06  | -0.37 | -2.20 | 0.52   | -0.06  | -0.11 | 4.81  | 4.95  | 3.72  | -10.50      | 0.0487    |
| PC 14:0/16:2                      | phosphatidylcholine      | 9.79    | 8.83  | 9.07  | 7.10  | 9.55   | 9.50   | 9.25  | 11.31 | 10.42 | 12.12 | 1.19        | 0.0507    |
| PC 16:0/16:1<br>RT: 6.592         | phosphatidylcholine      | 1.43    | -0.52 | -0.81 | 0.52  | 2.21   | 2.62   | 2.33  | 4.24  | 3.42  | 2.30  | 5.25        | 0.0076    |
| PC 16:0/16:1<br>RT: 7.634         | phosphatidylcholine      | 3.23    | -13.1 | -13.3 | -0.10 | -12.40 | 2.63   | 2.03  | 2.82  | 3.53  | 2.30  | -0.37       | 0.0263    |
| PC 16:0/18:0                      | phosphatidylcholine      | -10.0   | -10.6 | -10.9 |       | -9.95  | 5.93   | 5.01  | 5.29  | 4.96  |       | -0.51       | <0.000001 |
| PC 17:0/22:6                      | phosphatidylcholine      | -17.9   | 1.20  | 0.79  | -20.7 | -17.8  |        | 1.16  | 2.96  | 2.20  | 0.87  | -0.16       | 0.0561    |
| PC 18:0/20:4                      | phosphatidylcholine      | 6.22    | 13.87 | 6.14  | 4.94  | -4.94  | 13.85  |       | 14.34 | 14.92 | 13.22 | 2.69        | 0.0360    |
| PC 18:1/20:5                      | phosphatidylcholine      | 0.34    | -0.16 | -1.22 | -0.32 | 0.16   | -0.52  | 1.41  | 0.92  | 1.52  | 1.74  | -4.23       | 0.0335    |
| PC 19:1/18:2                      | phosphatidylcholine      | 0.09    | 0.29  | -0.25 | -0.80 | -0.09  | 0.14   | 1.48  | 1.80  | 1.35  | 0.46  | -6.84       | 0.0114    |
| PE 38:7                           | phosphatidylethanolamine | 6.55    | 6.04  | 6.14  |       | 6.54   | 7.77   | 7.36  | 7.26  | 6.08  | 7.45  | 1.14        | 0.0411    |
| PE 38:8                           | phosphatidylethanolamine | -0.72   | -0.33 | -0.70 |       | -0.92  | 0.77   | -0.09 | 0.15  | -0.46 | -0.23 | -0.04       | 0.0323    |
| PEtOH<br>16:0/18:3                | phosphatidylethanol      | 0.56    | 0.01  | 11.43 | 12.82 | 16.95  | -0.01  | -0.20 | 0.64  | 0.86  | -0.33 | 0.02        | 0.0443    |
| TG<br>16:0/18:2/22:6              | triglyceride             |         | 0.59  | 0.54  | 0.44  | 0.58   | 0.53   | 0.27  | 0.30  | 0.30  | 0.39  | 0.67        | 0.0225    |
| TG<br>18:0/18:1/18:2<br>RT: 5.751 | triglyceride             | 16.14   | 17.66 | 14.68 | 14.81 | 13.88  |        | 0.42  | 0.42  | 0.36  | 0.40  | 0.03        | <0.000001 |
| TG<br>18:0/18:1/18:2<br>RT: 5.752 | triglyceride             | 16.26   | 17.66 | 14.67 | 14.81 | 15.09  | 0.48   | 0.42  | 0.42  | 0.36  |       | 0.03        | <0.000001 |
| TG<br>18:1/18:1/22:4              | triglyceride             | 6.31    | 2.81  |       | 4.59  | 5.13   | 1.81   | 2.23  | 1.29  | 4.62  | 2.96  | 0.55        | 0.0531    |
| TG<br>18:2/22:6/22:6              | triglyceride             | -0.52   | -1.54 | -2.97 |       | -3.78  | -3.42  | -14.4 | -14.4 | -14.5 | -2.84 | 4.51        | 0.0471    |
| TG 56:8                           | triglyceride             |         | 0.59  | 0.54  | 0.44  | 0.58   | 0.51   | 0.27  | 0.30  | 0.30  | 0.39  | 0.66        | 0.0156    |
| TG 62:14                          | triglyceride             | -0.51   | -1.85 | -2.98 |       | -3.78  | -3.43  | -14.4 | -14.4 | -14.5 | -2.85 | 4.36        | 0.0484    |

RT: retention time

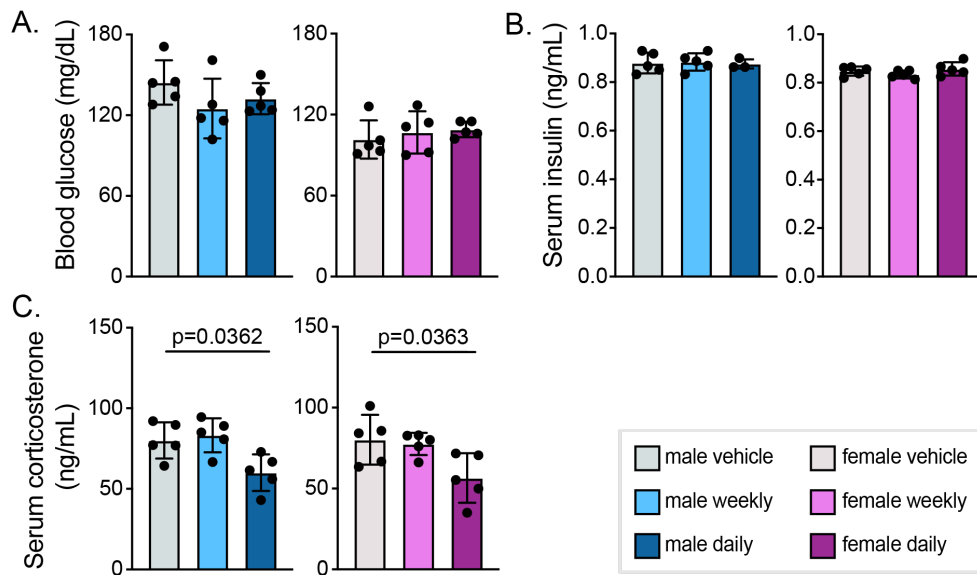

**Supplemental Figure 1. Circulating glucose, insulin, and corticosterone were not changed by weekly prednisone. (A-B)** Blood glucose (A) and insulin (B) did not change in response to weekly or daily treatment in male or female mice. **(C)** Daily-treated animals of both sexes have reduced circulating corticosterone, but weekly-treated animals did not in comparison to vehicle-treated. (C) One-way ANOVA.

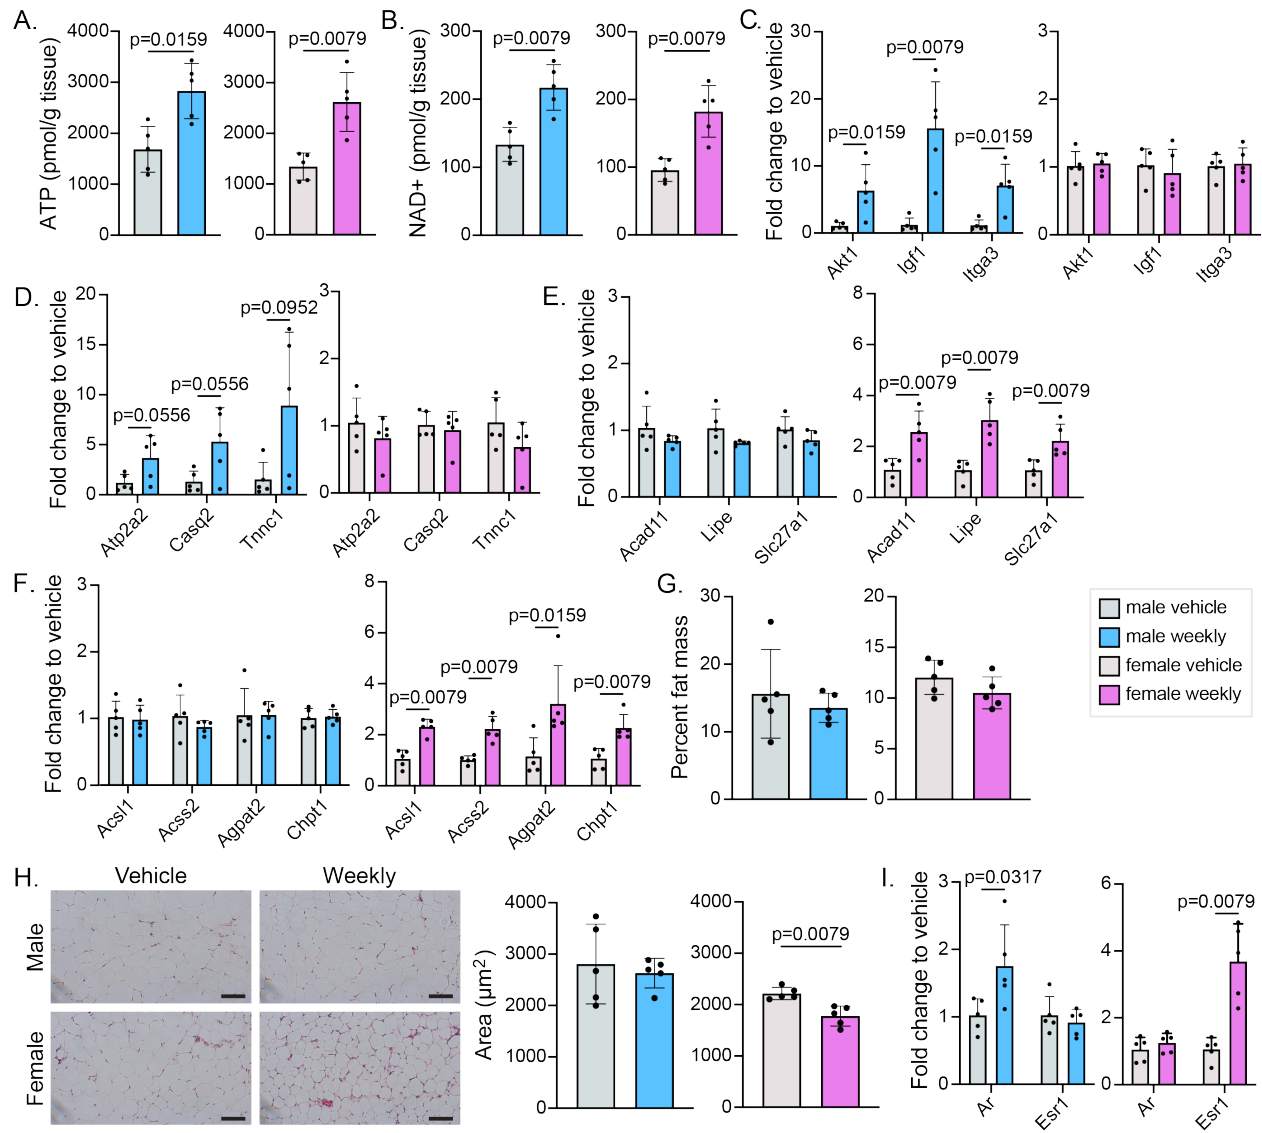

**Supplemental Figure 2. Weekly prednisone exerts the same effect in 18-week-old mice as 10-week-old.** (A-B) Weekly-treated mice had increased concentrations of ATP (A) and NAD+ (B) compared to vehicle-treated animals. (C-F) Animals administered weekly prednisone starting at 18 weeks had sex-specific upregulation of IGF1 pathway (C), calcium-handling (D), and lipid metabolism (E-F) genes. (G-H) Although whole body percent fat mass did not change after four weeks of treatment (G), visceral fat pad adipocytes had significantly reduced cross-sectional area in females (H). (I) 18-week-old mice had sex-specific upregulation of the genes encoding the sex steroid receptors. (A-I) Mann-Whitney; black bar = 100 $\mu\text{m}$ .

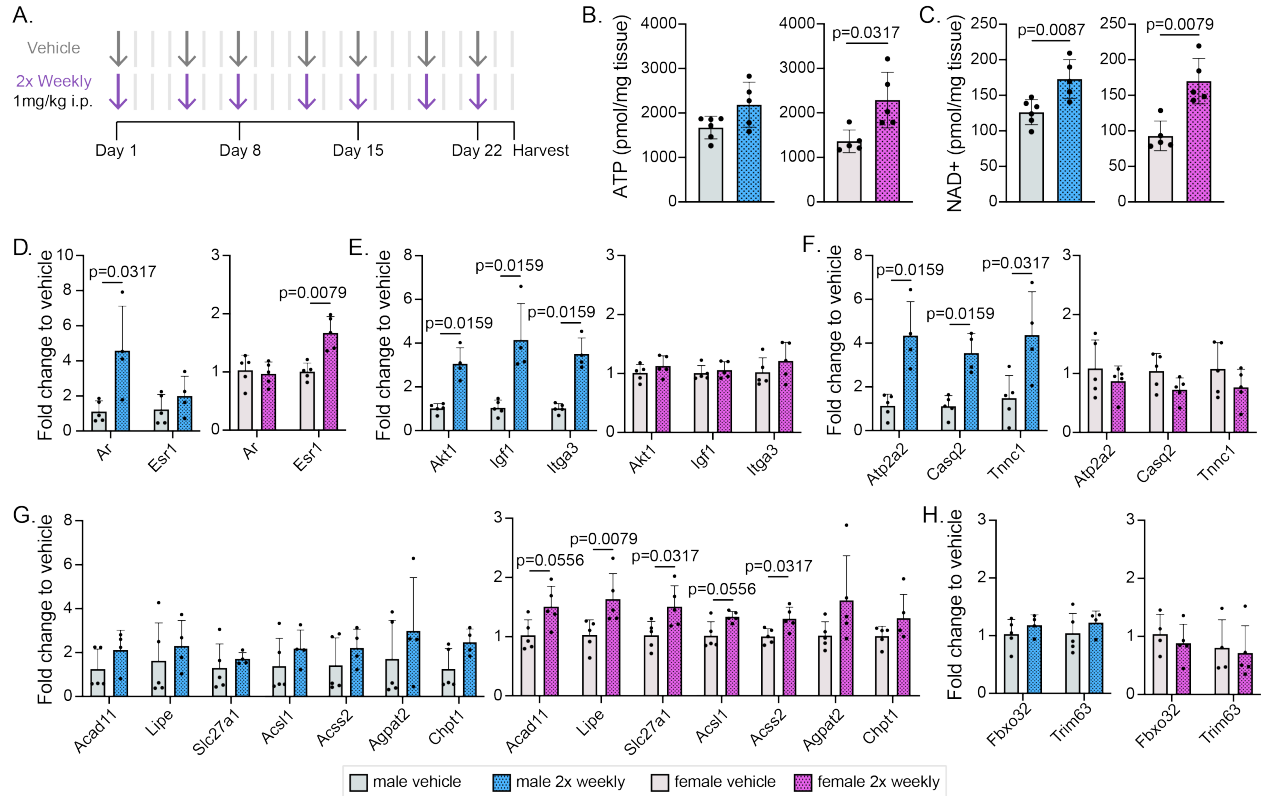

**Supplemental Figure 3. Twice-weekly prednisone exerts some of the same effects as once-weekly.** (A) C57BL/6 mice were treated for three weeks with vehicle (DMSO) or prednisone twice a week and then analyzed. Arrows indicate i.p. injection; bars indicate no injection. (B-C) Female mice treated twice-weekly had increased concentrations of ATP (B) and NAD<sup>+</sup> (C) compared to vehicle-treated animals, while males only exhibited increased NAD<sup>+</sup>. (D-H) Animals administered twice-weekly prednisone had sex-specific upregulation of sex steroid receptor (D), IGF1 pathway (E), calcium-handling (F), and some lipid metabolism (G) genes. (H) Atrogenes expression was not upregulated by twice-weekly prednisone. (A-H) Mann-Whitney

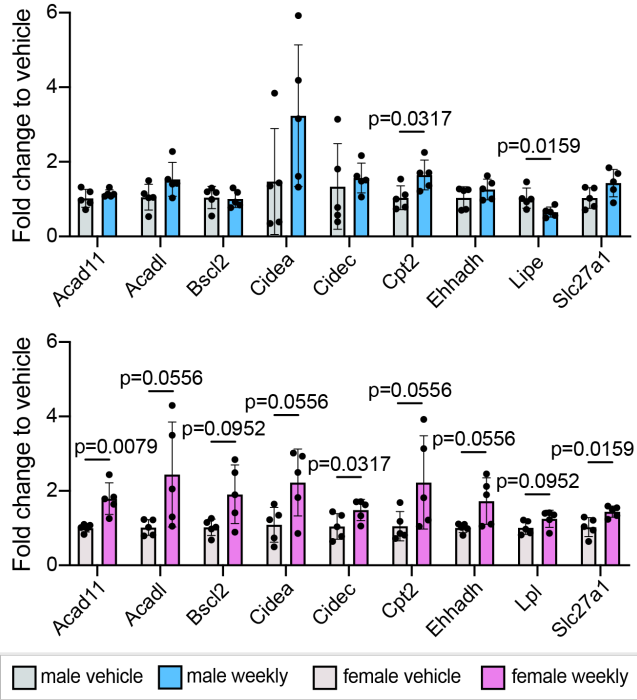

**Supplemental Figure 4. qPCR validation of lipid metabolism genes.** Lipid metabolism genes were significantly upregulated in weekly-treated females but were mostly unchanged in weekly-treated males. P-value determined by Mann-Whitney.



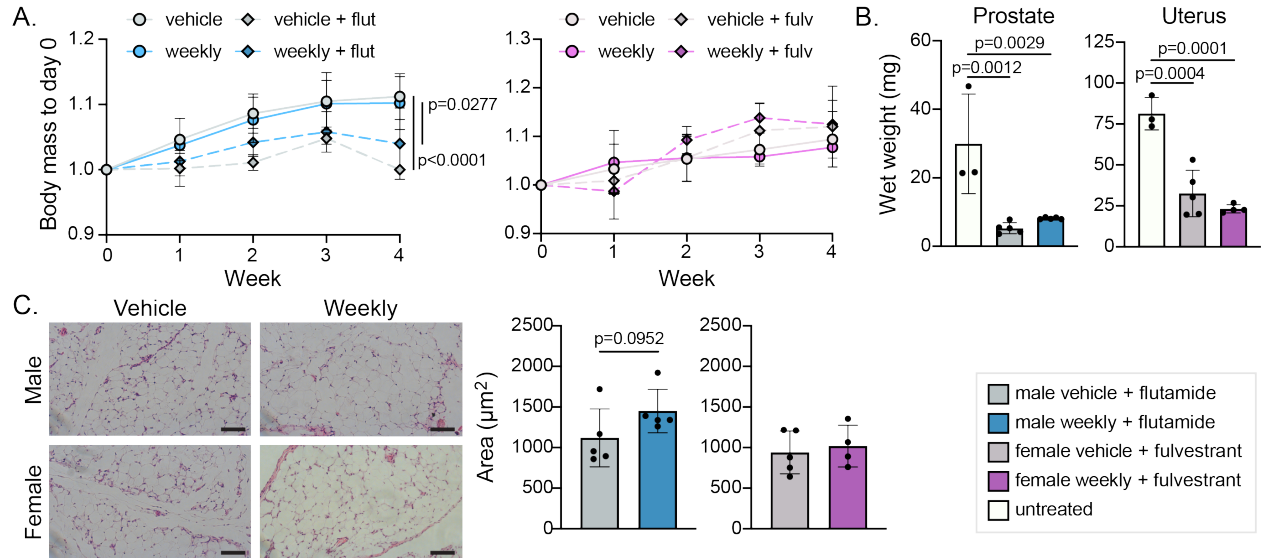

**Supplemental Figure 5. Sex steroid receptor inhibition affects body mass and reproductive organ size.** (A) Male mice treated with flutamide for four weeks had significantly reduced body weight, while females treated with fulvestrant had no change in body mass. (B) Both male and female mice had significantly reduced reproductive organ wet weight after four weeks of sex steroid inhibitor treatment. (C) Visceral fat pad adipocytes had significantly increased cross-sectional area in males after co-treatment with flutamide and weekly prednisone, while female adipocytes did not change in size. (A) Two-way ANOVA; (B) One-way ANOVA; (C) Mann-Whitney; black bar =  $100\mu\text{m}$

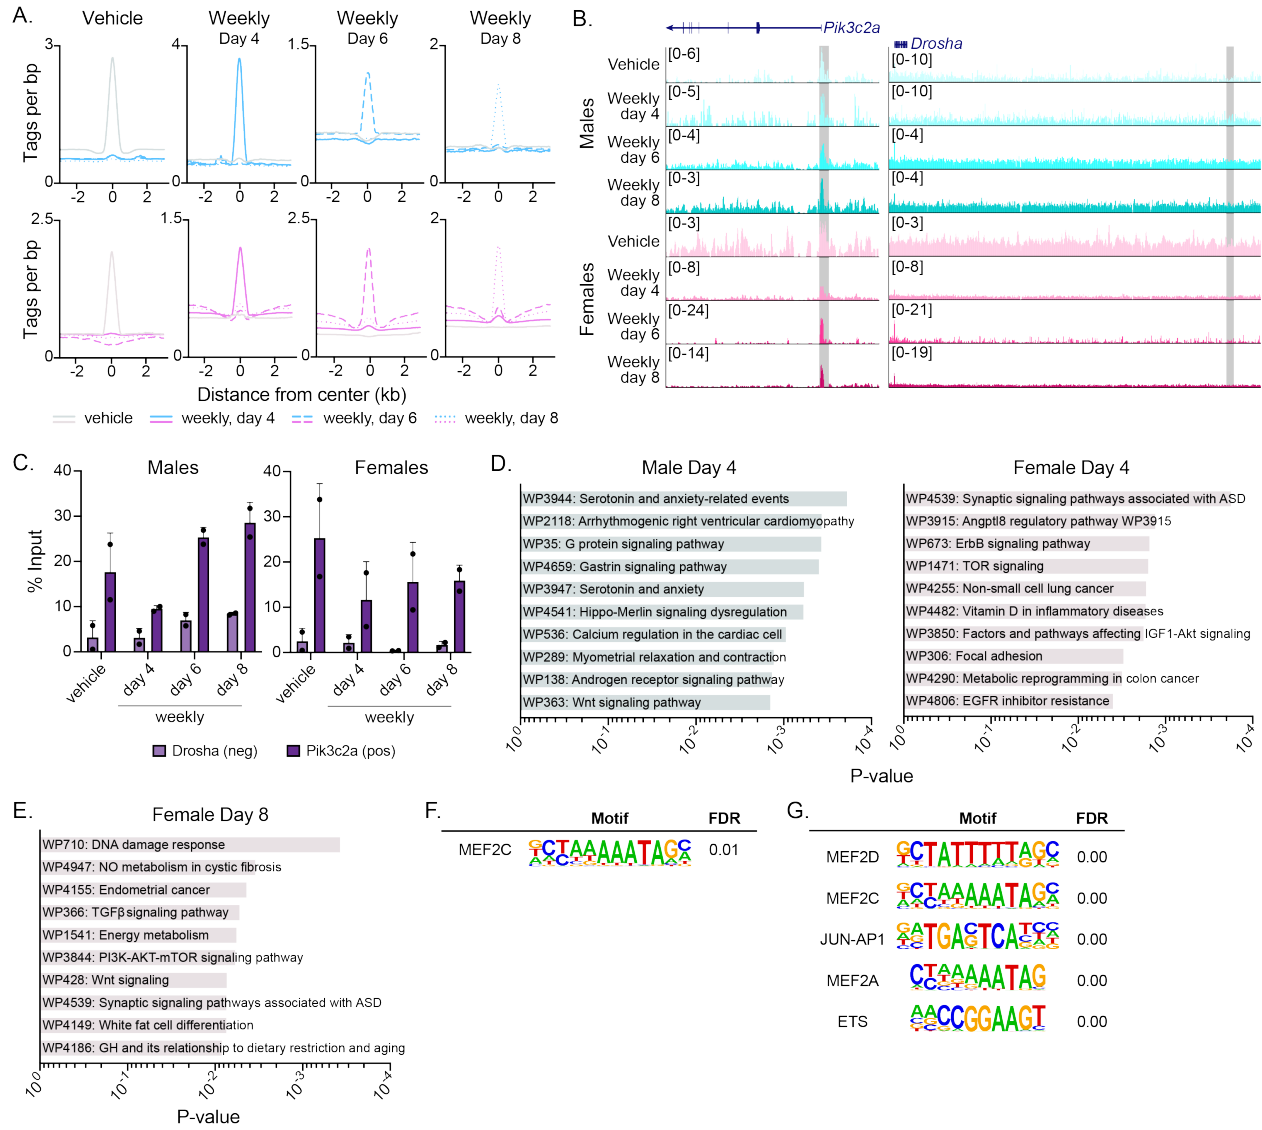

**Supplemental Figure 6. H3K27ac ChIPseq in isolated myofibers. (A)** Tag density distribution plots for peaks unique to each time point; top row = males, bottom row = females. **(B-C)** ChIPseq tracks (B) and qPCR validation (C) of loci called as either a peak at all time points (*Pik3c2a*) or not called as a peak at any time point (*Drosha*). **(D)** Gene ontology of top 500 enhancers by peak score in male and female myofibers four days after last prednisone injection. **(E)** Gene ontology of top 500 enhancers by peak score that were maintained out to day eight in females. **(F-G)** Most significantly enriched motifs in male (F) and female (G) enhancers that were maintained out to day eight after last injection.
